# Supplementary material
Source: PubMed Central journal article supplement (PMC3029765)
Supplement: 1017430108_pnas.1017430108_SI.pdf [file 1017430108_pnas.1017430108_SI.pdf]

# Supporting Information

Huang et al. 10.1073/pnas.1017430108

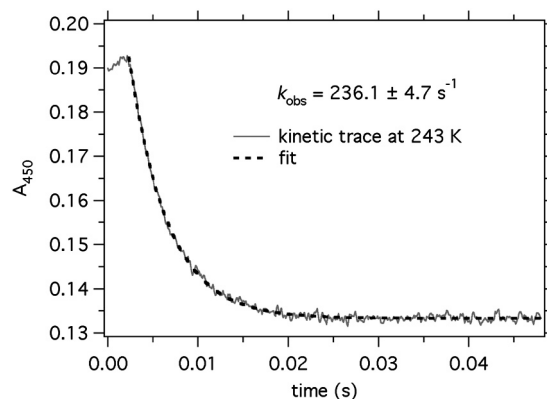

Fig. S1. Kinetic trace and single exponential fit of the data at 243 K. Values of  $k_{\text{obs}}$  in Figs. S1–S6 are the mean of eight determinations for each figure.

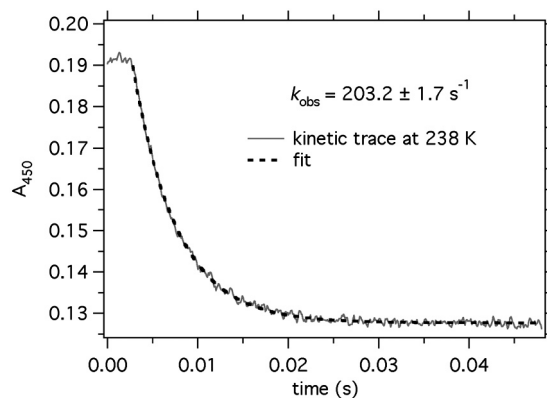

Fig. S2. Kinetic trace and single exponential fit of the data at 238 K.

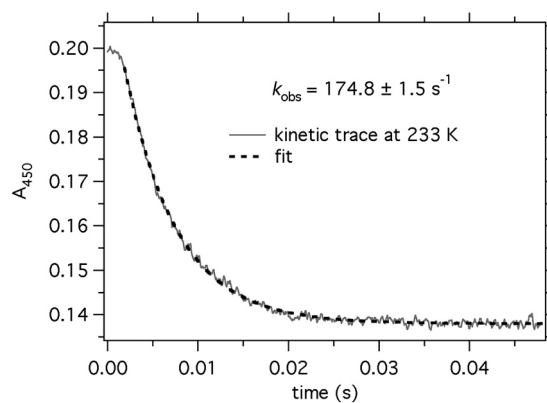

Fig. S3. Kinetic trace and single exponential fit of the data at 233 K.





**Table S2. Comparison of experimental and computed structural metrics**

| Method/basis set | $[\text{Ni}(\text{pyN}_2^{\text{Me}_2})(\text{OH})]^-$ |              |          | $[\text{Ni}(\text{pyN}_2^{\text{Me}_2})(\text{OCO}_2\text{H})]^-$ (P2*) |             |          |          |          |          |
|------------------|--------------------------------------------------------|--------------|----------|-------------------------------------------------------------------------|-------------|----------|----------|----------|----------|
|                  | Ni–N(py)                                               | Ni–N(amide)  | Ni–O1    | Ni–N(py)                                                                | Ni–N(amide) | Ni–O2    | C–O1     | C–O2     | C=O3     |
| experimental*    | 1.826(3)                                               | 1.911(2)     | 1.825(3) | 1.817(4)                                                                | 1.896(4)    | 1.871(4) | 1.293(6) | 1.253(7) | 1.286(7) |
| B3LYP/6-31G(d)   | 1.816                                                  | 1.926, 1.929 | 1.791    | 1.816                                                                   | 1.916       | 1.856    | 1.375    | 1.286    | 1.236    |
| (DMF solvation)  | 1.820                                                  | 1.917, 1.923 | 1.803    | 1.818                                                                   | 1.913       | 1.864    | 1.375    | 1.284    | 1.237    |
| B3LYP/DGDZVP     | 1.845                                                  | 1.955, 1.959 | 1.822    | 1.838                                                                   | 1.947       | 1.883    | 1.383    | 1.287    | 1.239    |
| (DMF Solvation)  | 1.847                                                  | 1.941, 1.956 | 1.843    | 1.839                                                                   | 1.942       | 1.896    | 1.384    | 1.284    | 1.241    |
| BP86/6-31G(d)    | 1.790                                                  | 1.897, 1.903 | 1.786    | 1.793                                                                   | 1.894       | 1.857    | 1.387    | 1.300    | 1.247    |
| (DMF solvation)  | 1.792                                                  | 1.898, 1.890 | 1.794    | 1.795                                                                   | 1.891       | 1.862    | 1.385    | 1.300    | 1.247    |
| BP86/DGDZVP      | 1.819                                                  | 1.931, 1.938 | 1.823    | 1.819                                                                   | 1.930       | 1.888    | 1.396    | 1.301    | 1.249    |
| (DMF solvation)  | 1.822                                                  | 1.919, 1.932 | 1.838    | 1.822                                                                   | 1.927       | 1.896    | 1.396    | 1.299    | 1.251    |

\*Both experimental structures and all calculated P2 geometries are  $C_s$  symmetric.
